# Supplementary material for: Telemedicine in Sports under Extreme Conditions: Data Transmission, Remote Medical Consultations, and Diagnostic Imaging
Source: MDPI journal article supplement (doi:10.3390/ijerph20146371), 2023-07-15
Supplement: s1 [file s1]

## **Supplementary Material 1**

### **Search string launched on PubMed.**

((((Tele\*[tiab]) OR ("Telemedicine"[mh]) OR ("Teleradiology"[mh]) OR ("Telerehabilitation"[mh]) OR ("Rehabilitation" [mh]) AND (Tele\*)) OR ("Telepathology" [mh]) OR ("Telenursing" [mh]) OR ("Remote consultation" [mh]) OR ("Emergency Medical Service Communication Systems" [mh]) OR ("Internet-Based Intervention" [mh])) AND ((Sports [mh]) OR ("Sports Medicine" [mh])) )

### **Search string launched on WOS:**

(Telemedicine OR Teleradiology OR Telerehabilitation OR Telepathology OR Telenursing OR Remote Consultation) AND (Sports OR Sports Medicine)  
ALL fields
